1           **GABA quantification in human anterior cingulate cortex**

2

3   Jan Weis, PhD<sup>1\*</sup>, Jonas Persson, PhD<sup>2</sup>, Andreas Frick, PhD<sup>3</sup>, Fredrik Åhs, PhD<sup>4</sup>, Maarten  
4   Versluis, PhD<sup>5</sup>, Daniel Alamidi, PhD<sup>6</sup>

5

6   <sup>1</sup>Department of Medical Physics, Uppsala University Hospital, Uppsala, Sweden

7   <sup>2</sup>Department of Neuroscience, Uppsala University, Uppsala, Sweden

8   <sup>3</sup>The Beijer Laboratory, Department of Neuroscience, Uppsala University, Uppsala, Sweden

9   <sup>4</sup>Department of Psychology and Social Work, Mid Sweden University, Östersund, Sweden

10   <sup>5</sup>Philips, Best, The Netherlands,

11   <sup>6</sup>Philips, Stockholm, Sweden

12

13   \*Correspondence to:   Jan Weis

14                               Department of Medical Physics,

15                               Uppsala University Hospital,

16                               SE-751 85 Uppsala, Sweden

17                               E-mail: [jan.weis@radiol.uu.se](mailto:jan.weis@radiol.uu.se), Tel: +46 – 18 – 611 48 07

18

19

20   **Short title:** GABA quantification in human brain

21

22

23

24

25 **Abstract**

26  $\gamma$ -Aminobutyric acid (GABA) is a primary inhibitory neurotransmitter in the human brain. It  
27 has been shown that altered GABA concentration plays an important role in a variety of  
28 psychiatric and neurological disorders. The main purpose of this study was to propose a  
29 combination of PRESS and MEGA-PRESS acquisitions for absolute GABA quantification and  
30 to compare GABA estimations obtained using total choline (tCho), total creatine (tCr), and total  
31 N-acetyl aspartate (tNAA) as the internal concentration references with water referenced  
32 quantification. The second aim was to demonstrate the fitting approach of MEGA-PRESS  
33 spectra with QuasarX algorithm using a basis set of GABA, glutamate, glutamine, and NAA in  
34 vitro spectra. Thirteen volunteers were scanned with the MEGA-PRESS sequence at 3T.  
35 Interleaved water referencing was used for quantification,  $B_0$  drift correction and to update the  
36 carrier frequency of RF pulses in real time. Reference metabolite concentrations were acquired  
37 using a PRESS sequence with short TE (30 ms) and long TR (5000 ms). Absolute concentration  
38 were corrected for cerebrospinal fluid, gray and white matter water fractions and relaxation  
39 effects. Water referenced GABA estimations were significantly higher compared to the values  
40 obtained by metabolite references. We conclude that QuasarX algorithm together with the basis  
41 set of in vitro spectra improves reliability of GABA+ fitting. The proposed GABA  
42 quantification method with PRESS and MEGA-PRESS acquisitions enables the utilization of  
43 tCho, tCr, and tNAA as internal concentration references. The use of different concentration  
44 references have a good potential to improve the reliability of GABA estimation.

45

46

47

48

49

## 50 **Introduction**

51 Two important neurotransmitters in the mammalian brain are glutamate (Glu) and  $\gamma$ -  
52 aminobutyric acid (GABA). Glu is the principal excitatory neurotransmitter in the vertebrate  
53 nervous system and is involved in every major excitatory brain function [1]. Glu serves as a  
54 metabolic precursor for GABA which is the primary inhibitory neurotransmitter. GABA plays  
55 a crucial role in shaping and regulating neuronal activity [2]. Changes in GABA concentrations  
56 have been associated with a variety of neuropsychiatric disorders, such as depression, anxiety,  
57 epilepsy, schizophrenia, ADHD, chronic pain, etc. [3, 4].

58 Glu can be quantified with good accuracy by short echo time ( $TE < 40$  ms) magnetic  
59 resonance spectroscopy using 3, 4 and 7T scanners [5-7]. However, the quantification of GABA  
60 is challenging because GABA spectral lines centered at 1.89, 2.28 and 3.01 ppm are overlapped  
61 with the strong signals of total creatine (tCr) (creatine and phosphocreatine), Glu, glutamine  
62 (Gln), total N-acetylaspartate (tNAA) (NAA and N-acetylaspartylglutamate (NAAG)),  
63 macromolecules (MM) and others. The most widely used approach for GABA detection at 3T  
64 is a J-difference Mescher-Garwood (MEGA) spectral editing technique incorporated within a  
65 point resolved spectroscopy (PRESS) sequence [8]. MEGA-PRESS exploits the scalar (J)  
66 coupling between GABA C4 protons ( $^4\text{CH}_2$ ) at 3.01 ppm and C3 protons ( $^3\text{CH}_2$ ) at 1.89 ppm.  
67 J-difference editing involves the acquisition of two spectra measured with TE 68 ms. The first  
68 (ON) spectrum is acquired by applying a pair of frequency-selective GABA-editing RF pulses  
69 (center frequency 1.89 ppm). These pulses invert the C3 spins and thereby refocus coupled C4  
70 spins (outer two peaks of pseudo-triplet) without affecting the overlapping tCr peak at 3.03  
71 ppm. The second (OFF) spectrum is measured with editing frequency-selective pulses at center  
72 frequency 7.46 ppm, which are not expected to have an impact on the spectrum. The unaffected  
73 spin evolution results in inverted outer two lines of the C4 pseudo-triplet at TE of 68 ms.  
74 Whereas the tCr spectral line is removed by ON and OFF spectra subtraction, the two outer

75 lines of GABA C4 triplet are summed and the central peak of the GABA triplet is suppressed  
76 [4, 8]. Furthermore, MM resonances at ~1.7 ppm are also inverted by editing frequency-  
77 selective RF pulses and coupled to MM protons at 3 ppm. These co-edited MM signals overlap  
78 with GABA C4 resonances. The resulting GABA peak is therefore referred to as GABA+ to  
79 point out the summation of GABA with MM signals. Recent studies showed that approximately  
80 50% of GABA+ intensity originates from MM [3].

81 Cerebral GABA content is most often expressed as a spectral intensity ratio of  
82 GABA+/tCr. A disadvantage of such an approach is the fact that it is difficult to determine  
83 whether the alteration is caused by the numerator, denominator, or both. A suitable example is  
84 the tCr concentration that is subject to change in patients with schizophrenia, Alzheimer's and  
85 Parkinson diseases [9, 10]. This problem can be minimized by the evaluation of GABA+  
86 spectral intensity ratio to the intensity of other metabolites or to the intensity of the water. The  
87 alternative to the unitless spectral intensity ratio is absolute quantification. The most common  
88 method for absolute GABA quantification utilizes tissue water as an internal concentration  
89 reference [11-13]. However, the quantification is not straightforward because the brain water  
90 originates from three tissue compartments: cerebrospinal fluid (CSF), gray (GM) and white  
91 matter (WM). Each compartment has different MR-visible water fraction and is weighted by  
92 different  $T_1$  and  $T_2$  relaxation times.

93 Recently, GABA estimation using tCr as an internal concentration reference was suggested  
94 as an alternative to water reference [14, 15]. This approach benefits from the fact, that partial  
95 volume and relaxation corrections are unnecessary because metabolites originate only from GM  
96 and WM compartments and the relaxation times of metabolites are approximately equal in both  
97 compartments. Grewal et al [15] assumed tCr to be 7.1 mM. This concentration was estimated  
98 for WM using water referenced spectroscopic imaging (PRESS, TR/TE 1500/135 ms) [16].  
99 Similarly, Bhattacharyya et al [14] applied the value 9.22 mM measured by single-voxel PRESS

100 technique (TR/TE 2700/68 ms). A short TR and long TE caused these approaches to be sensitive  
101 to the inaccuracies of tCr and water relaxation times in WM, GM, and CSF.

102 The goal of this study was threefold: 1) to demonstrate a new fitting approach of MEGA-  
103 PRESS spectra using QuasarX algorithm as implemented in jMRUI 6.0 software package [17].  
104 A basis set of GABA, Glu, Gln, and NAA in vitro spectra were measured for this purpose; 2)  
105 to quantify GABA using water as the internal concentration reference; and 3) to quantify GABA  
106 using total choline (tCho: free choline, phosphocholine, and glycerophosphocholine), tCr,  
107 tNAA as the internal concentration references. Contrary to previous studies [14, 15], the  
108 reliability of reference tCho, tCr, and tNAA concentrations was improved by using a PRESS  
109 sequence with short TE (30 ms), long TR (5000 ms) together with partial volume and relaxation  
110 corrections for WM, GM and CSF content in each voxel.

111

## 112 **Material and Methods**

### 113 **Study population**

114 In total, thirteen volunteers (6 females and 7 males) were recruited. The volunteers underwent  
115 PRESS and MEGA-PRESS measurements. Mean age of the participants was 37±10 years  
116 (range: 24–61). All volunteers were healthy without any history of psychiatric or neurological  
117 disorders. Ethical approvals were obtained from local Institutional Review Boards and written  
118 informed consent was obtained from each participant.

119

### 120 **Phantoms**

121 Four phantoms were produced according to the guidelines for the LCMoDel's model spectra  
122 [18]. The phantoms contained aqueous solutions of GABA (200 mM), Glu (100 mM), Gln (100  
123 mM), and NAA (50 mM). Each phantom contained a single metabolite. Aqueous solutions were  
124 prepared using a phosphate buffer consisting of 72 mM K<sub>2</sub>HPO<sub>4</sub>, 28 mM KH<sub>2</sub>PO<sub>4</sub>, 1 g/L NaN<sub>3</sub>,

125 and 1 mM sodium trimethylsilyl propanesulfonate (DSS). Solution's pH was adjusted to 7.2.  
126 The chemicals were purchased from Sigma-Aldrich AB (Stockholm, Sweden).

127

### 128 **MRI and MRS acquisition protocols**

129 All experiments were performed on 3T scanner (Achieva dStream, Philips Healthcare, Best,  
130 The Netherlands). The data were acquired with a 32 channel receiver head coil. Whole brain  
131 3D T<sub>1</sub>-weighted turbo FFE images (TR/TE 8/3.8 ms, isotropic resolution 1x1x1 mm<sup>3</sup>) were  
132 acquired to guide the positioning of the voxel in the anterior cingulate cortex (ACC) (Fig 1).  
133 The GABA spectra were acquired with a MEGA-PRESS sequence using the following  
134 parameters: voxel size 4x4x2 cm<sup>3</sup>, TR/TE 2000/68 ms, 320 alternating ON-OFF spectra, 14 ms  
135 GABA-editing RF pulses at 1.9 (ON) and 7.5 (OFF) ppm, spectral bandwidth 2000 Hz, 1024  
136 time domain data points, and 40 blocks. Each block started with the acquisition of one  
137 unsuppressed reference water spectral line followed by four pairs of water suppressed ON-OFF  
138 spectra acquired with 4-step phase-cycling. The unsuppressed water signal was used as the  
139 internal concentration reference, for eddy current corrections, for B<sub>0</sub> drift correction and for  
140 updating the carrier frequency of RF pulses in real time. Reference metabolite concentrations  
141 were measured using the standard PRESS sequence (TR/TE 5000/30 ms, spectral bandwidth  
142 2000 Hz, 1024 data points, 32 averages, 16 phase cycle steps) with the same voxel size and  
143 position. Two dummy excitations were followed by 16 non-water-suppressed and 32 water-  
144 suppressed scans.

145

146 **Fig 1. Spectroscopy voxel position.** Representative voxel (4x4x2 cm<sup>3</sup>) placement in anterior  
147 cingulate cortex and the results of partial volume segmentation of CSF, GM and WM (brown).  
148 Transversal images (reconstructed pixel size 0.47x0.47 mm<sup>2</sup>, slice thickness 2 mm) were used  
149 for segmentation and for reconstruction of coronal and sagittal slices.

150

151 MEGA-PRESS spectra of GABA, Glu, Gln, and NAA aqueous solutions were measured  
152 a few hours after preparation. The voxel size was  $3 \times 3 \times 3 \text{ cm}^3$  and temperature was kept at  $22 \text{ }^\circ\text{C}$   
153 (room temperature) during the acquisition. All other MEGA-PRESS parameters were identical  
154 to the in vivo experiments.

155

### 156 **Post processing and quantification**

157 Reconstructed brain images (matrix  $512 \times 512$ , pixel size  $0.47 \text{ mm}$ , slice thickness  $2 \text{ mm}$ ) were  
158 used for GM, WM, and CSF segmentation (Fig 1). Segmentation was performed by using the  
159 automated segmentation tool (FAST) [19]. A binary mask of the water PRESS box was created  
160 using the SVMask tool (Philips Healthcare, Michael Schär).

161 MEGA-PRESS spectra were processed with jMRUI 6.0 software package [17]. Each  
162 spectrum was zero filled to 8192 points and the residual water was removed by Hankel-Lanczos  
163 Singular Value Decomposition (HLSVD) filter. No apodization of the FIDs was applied in this  
164 study. The in vivo spectra were fitted by the QuasarX algorithm (QUEST with new constrains  
165 and shape peak selection). This nonlinear least-squares algorithm fits a time-domain model  
166 function, made up from a basis set of in vitro spectra, to in vivo data. Our basis set contained  
167 MEGA-PRESS spectra of GABA (GABA+), Glu, Gln, NAA and NAAG aqueous solutions  
168 (Fig 2). NAAG spectrum was approximated by shifted NAA spectrum, with the main peak  
169 shifted to  $2.045 \text{ ppm}$  from  $2.01 \text{ ppm}$  [18]. GABA+ spectrum was made by modifying GABA  
170 spectrum. Contribution of MM signals to GABA was empirically simulated by adding the  
171 Lorentzian line (linewidth  $5 \text{ Hz}$ ) to the central peak of pseudo-triplet at  $3 \text{ ppm}$ . The amplitude  
172 was adjusted to be about  $\sim 10\%$  higher compare to outer two peaks (Fig 2). The zero-order phase  
173 correction of in vivo MEGA-PRESS spectrum was estimated by fitting the tCho, tCr, and tNAA  
174 singlets in averaged OFF spectrum using AMARES algorithm (Fig 3). The resulting spectrum

175 was then fitted by the QuasarX algorithm (Fig 4). Gaussian line shapes were used to fit GABA+  
176 spectral lines.

177

178 **Fig 2. Basis set of in vitro spectra.** MEGA-PRESS spectra of GABA, Gln, Glu, and NAA  
179 aqueous solutions, and simulated GABA+.

180 **Fig 3. An example of in vivo OFF spectrum.** AMARES fits of the tCho, tCr, and tNAA  
181 singlets, and residue.

182 **Fig 4. Representative in vivo MEGA-PRESS spectrum and fits.** The spectrum was fitted by  
183 the QuasarX algorithm using the basis set spectra shown in Fig 2.

184

185 The unsuppressed water signal was fitted by Hankel-Lanczos Squares Singular Value  
186 Decomposition (HLSSVD) algorithm. The AMARES and QuasarX algorithms provide the  
187 Cramér-Rao lower bound (CRLB) standard deviation (CRSD). The fitting error was computed  
188 as the percentage ratio of CRSD to the FID's amplitude. Water scaled GABA concentration in  
189 relation to wet weight tissue (mol/kg) was computed according to the equation:

$$190 \quad C_{\text{GABA}} = \frac{I_{\text{GABA}}}{I_{\text{H}_2\text{O}}} \times \frac{2}{N_{\text{GABA}}} \times \frac{1}{R_{\text{GABA}}} \times W_{\text{conc}} \times \frac{\text{MM}_{\text{cor}}}{\text{eff}_{\text{GABA}}} \quad (1)$$

191 where  $I_{\text{GABA}}$  is the GABA+ spectral intensity at ~3 ppm,  $I_{\text{H}_2\text{O}}$  is intensity of reference water line,  
192  $N_{\text{GABA}} = 2$  is the number of protons contributing to  $I_{\text{GABA}}$  resonance,  $R_{\text{GABA}}$  is the GABA  
193 attenuation factor,  $\text{MM}_{\text{cor}} = 0.5$  is a macromolecule correction factor [11, 20, 21], and  $\text{eff}_{\text{GABA}}$   
194 = 0.5 is the editing efficiency [22].  $W_{\text{conc}}$  is the reference water concentration corrected for  
195 partial volume and relaxation effects [16, 23, 24]:

196

$$197 \quad W_{\text{conc}} = \frac{W_{\text{H}_2\text{O}} (f_{\text{GM}} R_{\text{H}_2\text{O-GM}} + f_{\text{WM}} R_{\text{H}_2\text{O-WM}} + f_{\text{CSF}} R_{\text{H}_2\text{O-CSF}})}{(1 - f_{\text{CSF}})} \quad (2)$$

198 and



$$f_x = \frac{c_x \vartheta_x}{0.82 \varrho_{GM} + 0.7 \varrho_{WM} + 0.99 \varrho_{CSF}} \quad (3)$$

199

200

201 where  $W_{H_2O}$  is the molal concentration of pure water (55.51 mol/kg),  $f_x$  is the mole fraction of  
202 water in the voxel's GM, WM and CSF,  $\vartheta_x$  is the GM, WM and CSF volume fractions and  $c_x$   
203 is the relative density of MR visible water in GM (0.82) WM (0.7), and CSF (0.99) [25, 26].  
204  $R_{H_2O-GM}$ ,  $R_{H_2O-WM}$ , and  $R_{H_2O-CSF}$  are PRESS relaxation attenuation factors  $R = \exp(-TE/T_2) \times [1 -$   
205  $\exp(-TR/T_1)]$  of water in GM, WM, and CSF, respectively. The following relaxation times were  
206 used for corrections: GABA ( $T_1$  1310 ms,  $T_2$  88 ms) [27, 28], water in GM ( $T_1$  1820 ms,  $T_2$  99  
207 ms), WM ( $T_1$  1084 ms,  $T_2$  69 ms), and CSF ( $T_1$  4163 ms,  $T_2$  503 ms) [29-31].

208 The GABA concentration was also assessed using tCho, tCr, and tNAA as the internal  
209 concentration references. The reference metabolite concentrations  $C_{MET}$ , Glu and other  
210 metabolites were measured by PRESS sequence with long TR (5000 ms) and short TE (30 ms)  
211 to minimize the influence of the water and metabolites relaxation effects. Concentrations were  
212 estimated by LCModel [18]. Partial volume and relaxation corrections were performed by  
213 adjusting LCModel control parameter WCONC according to the Eq. 2, i.e.  $WCONC = W_{conc}$   
214 [24]. It should be noted that the default LCModel control parameter ATTH2O for water  
215 attenuation correction was switched off ( $ATTH2O = 1$ ) because water relaxation corrections  
216 were already performed in Eq. 2. The absolute GABA concentration (mol/kg) was estimated  
217 according to the formula:

218

$$C_{GABA} = \frac{I_{GABA}}{I_{MET}} \times \frac{N_{MET}}{N_{GABA}} \times \frac{R_{MET}}{R_{GABA}} \times C_{MET} \times \frac{MM_{cor}}{eff_{GABA}} \quad (4)$$

219

220

221

222

where  $I_{MET}$  is the spectral intensity of reference metabolite in OFF spectrum (Fig 3),  $N_{MET}$  is the  
number of protons contributing to  $I_{MET}$  resonance (9 for tCho, 3 for tCr and tNAA),  $R_{MET}$  is the  
metabolite attenuation factor.  $C_{MET}$  is the reference metabolite concentration (mol/kg) of  
considered volunteer. Mean relaxation times of tCho ( $T_1$  1140 ms,  $T_2$  230 ms), tCr ( $T_1$  1110 ms,

223  $T_2$  163 ms), and tNAA ( $T_1$  1340 ms,  $T_2$  260 ms) were used in relaxation corrections [32]. It  
224 should be noted that only small differences in metabolite relaxation times were found between  
225 GM and WM [32, 33].

226

## 227 **Statistics**

228 The reported values are given as the mean  $\pm$  one SD.  $P < 0.05$  of a two-tailed Student's t-test  
229 was considered statistically significant. The relative variances (variance-to-mean ratio) were  
230 expressed in %. The two-tailed F-test was performed to compare variances of mean GABA  
231 concentrations obtained by different quantification methods.

232

## 233 **Results**

234 Thirteen volunteers underwent combined PRESS and MEGA-PRESS examinations. All  
235 experiments were successful, no spectra had to be discarded. Table 1 summarizes the water-  
236 scaled metabolite concentrations and CRLBs acquired by the PRESS (TR/TE 5000/30 ms)  
237 sequence. The spectra were processed by LCModel. The mean WM, GM, and CSF volume  
238 fractions were  $52.0 \pm 3.5\%$ ,  $33.2 \pm 2.5\%$ , and  $14.8 \pm 3.5\%$ , respectively. Spectra of GABA,  
239 Glu, Gln, and NAA aqueous solutions and simulated GABA+ spectrum are shown in Fig 2.  
240 These spectra were used as prior knowledge for fitting the volunteer's MEGA-PRESS spectra  
241 using the QuasarX algorithm. Figures 3 and 4 show representative in vivo results. The mean  
242 QuasarX fitting error of GABA+ intensity was  $1.5 \pm 0.2\%$  (range: 1.2 – 1.8%). The mean  
243 AMARES fitting errors of metabolites were  $1.0 \pm 0.1\%$ ,  $0.8\% \pm 0.1\%$ , and  $1.2 \pm 0.2\%$  for tCr,  
244 tNAA, and tCho, respectively. The mean spectral intensity ratios GABA+/tCr, GABA+/tNAA,  
245 and GABA+/tCho are shown in Table 2. The absolute GABA concentrations were computed  
246 according to Eq. 1 and Eq. 4 using tissue water, tCho, tCr, and tNAA as internal concentration  
247 references. The concentrations together with their relative variances are summarized in Table

248 3 and presented in Fig 5. Two-tailed F-tests detected no differences in the variances of GABA  
249 concentrations obtained by different methods.

250

251 **Fig 5. GABA concentrations.** Concentrations were estimates using H<sub>2</sub>O, tCho, tCr, and tNAA  
252 as the internal concentration references.

253

254 **Table 1. Water-scaled metabolite concentrations (mmol/kg) and**  
255 **CRLBs (%).**

|      | Concentration | CRLB         |
|------|---------------|--------------|
| GABA | 2.65 ± 0.44   | 18.62 ± 2.96 |
| Glu  | 10.84 ± 0.54  | 5.23 ± 0.44  |
| Glx  | 13.03 ± 1.03  | 6.69 ± 0.48  |
| tNAA | 12.37 ± 0.68  | 2.23 ± 0.44  |
| tCr  | 9.11 ± 0.57   | 2.0 ± 0.0    |
| tCho | 2.42 ± 0.20   | 2.85 ± 0.38  |
| mI   | 6.43 ± 0.51   | 3.92 ± 0.28  |

256

257 Concentrations were estimated from the PRESS spectra (TR/TE  
258 5000/30 ms).

259

260 **Table 2. GABA-to-metabolite spectral intensity ratio (a.u.).**

| GABA+/tCr    | GABA+/tNAA    | GABA+/tCho    |
|--------------|---------------|---------------|
| 0.070 ± 0.01 | 0.052 ± 0.007 | 0.088 ± 0.013 |

261

262 The spectral intensity ratios were evaluated from the MEGA-PRESS  
263 spectra.

264

265

266

267 **Table 3. GABA concentrations (mmol/kg).**

| Internal concentration reference |                   |                   |                   |
|----------------------------------|-------------------|-------------------|-------------------|
| H <sub>2</sub> O                 | tCho              | tCr               | tNAA              |
| 2.57 ± 0.26 (2.7)                | 1.63 ± 0.22 (3.1) | 1.46 ± 0.19 (2.6) | 1.61 ± 0.22 (3.1) |

268  
269 Concentrations were estimated from MEGA-PRESS spectra using H<sub>2</sub>O, tCho, tCr, and  
270 tNAA as the internal concentration references. Relative variances (%) are shown in parentheses.  
271

## 272 **Discussion**

273 To the best of our knowledge, this is the first study whereby a PRESS sequence with short TE  
274 and long TR together with a MEGA-PRESS sequence were used to estimate the absolute GABA  
275 concentration. Applied PRESS method improved the accuracy of individual reference  
276 metabolite concentrations and enabled utilization of tCho, tNAA and tCr as internal  
277 concentration references at the expense of a relatively short prolongation of the net  
278 measurement time (4 minutes in our case). Spectrum processing approach with QuasarX  
279 algorithm and the use of different concentration references have a good potential to improve  
280 the reliability of GABA estimation.

281 The anterior cingulate cortex was chosen because this region acts as a central node in the  
282 brain and is important for the regulation of advanced brain functions. The water scaled PRESS  
283 spectra were used for the individual reference metabolite quantification. The described  
284 approach with short TE and long TR together with the partial volume and relaxation corrections  
285 is regarded to be the most accurate. This is because errors due to inaccurate relaxation times  
286 were minimized. Low CRLBs of Glu, tCho, tCr, and tNAA LCModel fits (Table 1) indicate  
287 very good accuracy of the concentration estimates. The fitting errors of GABA signals were at  
288 the boundary of acceptable reliability (CRLB ~ 20%). However, it should be noted that average  
289 over a group of LCModel results can significantly reduce the uncertainty [18]. The

290 concentration estimates of Glu, Glx, tNAA, tCr and tCho are in line with previous studies  
291 performed at 3, 4, and 7 Tesla [5, 7].

292 The relative variances of absolute GABA concentrations estimated using H<sub>2</sub>O, tCho, tCr,  
293 and tNAA concentration references show similar dispersion. The comparison of our GABA  
294 concentrations with the literature data is not straightforward due to differences in tissue  
295 composition and data processing. Cerebral GABA content from ~1 up to 3.7 mM was  
296 previously reported [11-15, 35]. GM/WM ratio is an important issue because GABA content  
297 was reported to be from 1.5 to 8.7 times larger in GM relative to WM [14, 20, 34, 36].  
298 Differences in segmentation algorithms, spectrum processing methods, macromolecule  
299 correction factor  $MM_{cor}$  and accuracy of internal concentration references are also important  
300 factors that contribute to the variability of the concentration estimates.

301 The absolute GABA concentrations estimated using water reference and measured by  
302 PRESS (Table 1) and MEGA-PRESS (Table 3) are surprisingly in very good agreement.  
303 However, water referenced GABA concentrations were significantly higher than the  
304 concentrations estimated with tCho, tCr and tNAA references (Table 3, Fig 5). The main  
305 drawback of water referenced quantification using typical MEGA-PRESS (TR/TE 2000/68 ms)  
306 acquisition is the fact that partial volume and relaxation corrections (Eq. 2, 3) depend on the  
307 precision of WM, GM, and CSF segmentation and on the accuracy of nine experimental  
308 constants: water fractions and water relaxation times  $T_1$ ,  $T_2$  in GM, WM, and CSF. The  
309 advantage of GABA quantification using tCr, tCho, and tNAA as the internal concentration  
310 references is the fact that partial volume and relaxation corrections are unnecessary because  
311 metabolites originate only from GM and WM compartments and the relaxation times of tCho,  
312 tCr, and tNAA are approximately equal in both compartments [32, 33]. It should be noted, that  
313 the described metabolite reference method is still subject to all sources of error as in water  
314 referenced MEGA-PRESS approach because tCho, tCr, and tNAA were quantified from water

315 scaled PRESS spectra (TR/TE 5000/30 ms). However, the main difference is in relaxation  
316 correction accuracy. Standard water referenced MEGA-PRESS approach with a relatively short  
317 TR (2000 ms) and long TE (68 ms) is more susceptible to inaccuracies of relaxation times  
318 compare to the proposed metabolite referenced quantification using PRESS with long TR (5000  
319 ms) and short TE (30 ms). It should be noted, that quantification of tCho, tCr, and tNAA can  
320 be omitted in comparative studies and the most reliable literature values can be applied instead.  
321 Our GABA values can be compared with the concentrations estimated from the water scaled  
322 STEAM and SPECIAL spectra measured at 7 T scanners [5, 7]. The occipital lobe spectra were  
323 measured with long TR and a very short TE (6 ms). High spatial resolution facilitated fitting of  
324 the GABA triplet at 2.28 ppm which is uncontaminated by the macromolecules. GABA levels  
325 in the range of 1.3 - 1.6 mmol/kg were reported. These values were slightly underestimated  
326 because partial volume and relaxation corrections were not taken into consideration.  
327 Nevertheless, we believe that our metabolite referenced results (Table 3) conform to the most  
328 reliable literature values such as the GABA values reported by Mekle et al [5] and Tkac et al  
329 [7]. We hypothesize that our water referenced GABA values are overestimated due to  
330 inaccuracies in partial volume and relaxation corrections.

331

## 332 **Conclusion**

333 QuasarX algorithm together with the basis set of in vitro spectra improves reliability of GABA+  
334 fitting. The proposed GABA quantification method with PRESS and MEGA-PRESS  
335 acquisitions enables the utilization of tCho, tCr, and tNAA as internal concentration references.  
336 Water referenced GABA estimations were significantly higher compared to the values obtained  
337 by metabolite references. The use of different concentration references have a good potential to  
338 improve the reliability of GABA estimation.

339

## 340 **Acknowledgements**

341 The study was supported by the Swedish Research Council, the Swedish Brain Foundation, and  
342 the Swedish Foundation for Humanities and Social Sciences (Riksbankens jubileumsfond). Dr.  
343 Frick is supported by The Kjell and Märta Beijer Foundation and Dr. Persson is supported by a  
344 postdoctoral grant from the Swedish Brain Foundation.

345

## 346 **References**

- 347 1. Meldrum BS. Glutamate as a Neurotransmitter in the Brain: Review of Physiology and  
348 Pathology. *The Journal of Nutrition*. 2000; 130:1007S–1015S.
- 349 2. McCormic DA. GABA as an inhibitory neurotransmitter in human cerebral cortex. *J*  
350 *Neurophysiol* 1989; 62:1018-1027.
- 351 3. Mikkelsen M, Barker PB, Bhattacharyya PK, et al. Big GABA: Edited MR  
352 spectroscopy at 24 research sites. *Neuroimage* 2017; 159: 32-45.
- 353 4. Harris AD, Saleh MG, Eden RAE. Edited 1H magnetic resonance spectroscopy in  
354 vivo: Methods and metabolites. *Magn Reson Med* 2017; 77:1377-1389.
- 355 5. Mекle R, Mlynarik V, Gambarota G, Hergt M, Krueger G, Gruetter R. MR  
356 spectroscopy of the human brain with enhanced signal intensity at ultrashort echo  
357 times on a clinical platform at 3T and 7T. *Magn Reson Med* 2009; 61:1279-1285.
- 358 6. Oeltzschner G, Zöllner HJ, Jonuscheit M, Lanzman RS, Schnitzler A, Wittsack HJ. J-  
359 difference-edited MRS measures of  $\gamma$ -aminobutyric acid before and after acute  
360 caffeine administration. *Magn Reson Med* 2018; 80:2356-2365.
- 361 7. Tkac I, Öz G, Adriany G, Ugurbil K, Gruetter R. In vivo 1H NMR spectroscopy of the  
362 human brain at high magnetic fields: metabolite quantification at 4T vs. 7T. *Magn*  
363 *Reson Med* 2009; 62:868-879.

- 364 8. Mescher M, Merkle H, Kirsch J, Garwood M, Gruetter R. Simultaneous in vivo  
365 spectral editing and water suppression. *NMR Biomed* 1998; 11:266-278.
- 366 9. Öngür D, Prescot AP, Jensen JE, Cohen BM, Renshaw PF. Creatine abnormalities in  
367 schizophrenia and bipolar disorder. *Psychiatry Res* 2009; 172:44-48.
- 368 10. Pilatus U, Lais C, du Mesnil de Rochmont A, et al. Conversion to dementia in mild  
369 cognitive impairment is associated with decline of N-acetylaspartate and creatine as  
370 revealed by magnetic resonance spectroscopy. *Psychiatry Research: Neuroimaging*  
371 2009; 173:1-7.
- 372 11. Harris AD, Puts NAJ, Barker PB, Edden RAE. Spectral-editing measurements of  
373 GABA in the human brain with and without macromolecule suppression. *Magn Reson*  
374 *Med* 2015; 74:1523-1529.
- 375 12. Harris A, Puts NAJ, Edden RAE. Tissue correction for GABA-edited MRS:  
376 consideration of voxel composition, tissue segmentation, and tissue relaxations. *J*  
377 *Magn Reson Imag* 2015; 42:1431-1440.
- 378 13. O’Gorman RL, Michels L, Edden RAE, Murdoch JB, Martin E. In vivo detection of  
379 GABA and glutamate with MEGA-PRESS: reproducibility and gender effects. *J Magn*  
380 *Reson Imag* 2011; 33:1262-1267.
- 381 14. Bhattacharyya PK, Phillips MD, Stone LA, Lowe MJ. In vivo magnetic resonance  
382 spectroscopy measurement of gray-matter and white-matter gamma-aminobutyric acid  
383 concentration in sensorimotor cortex using a motion-controlled MEGA point-resolved  
384 spectroscopy sequence. *Magn Reson Imag* 2011; 29:374-379.
- 385 15. Grewal M, Dabas A, Saharan S, et al. GABA quantitation using MEGA-PRESS:  
386 Regional and hemispheric differences. *J Magn Reson Imag* 2016; 44:1619-1623.
- 387 16. Gasparovic Ch, Song T, Devier D, et al. Use of tissue water as a concentration  
388 reference for proton spectroscopic imaging. *Magn Reson Med* 2006; 55:1219-1226.



- 389 17. Naressi A, Couturier C, Devos JM, et al. Java-based graphical user interface for the  
390 MRUI quantitation package. *Magn Reson Mater Phys Biol Med* 2001; 12:141-152.
- 391 18. Provencher SW. Estimation of metabolite concentrations from localized in vivo NMR  
392 spectra. *Magn Reson Med* 1993; 30:672-679.
- 393 19. Zhang Y, Brady M, Smith S. Segmentation of brain MR images through a hidden  
394 Markov random field model and the expectation-maximization algorithm. *IEEE Trans*  
395 *Med Imaging* 2001; 20:45-57.
- 396 20. Mikkelsen M, Singh KD, Sumner P, Evans CJ. Comparison of the repeatability of  
397 GABA-edited magnetic resonance spectroscopy with and without macromolecules  
398 suppression. *Magn Reson Med* 2016; 7:946-953.
- 399 21. Shungu DC, Mao X, Gonzales R, et al. Brain  $\gamma$ -aminobutyric acid (GABA) detection  
400 in vivo with the J-editing  $^1\text{H}$  MRS technique: a comprehensive methodological  
401 evaluation of sensitivity enhancement, macromolecule contamination and test-retest  
402 reliability. *NMR Biomed* 2016; 29:932-942.
- 403 22. Mullins PG, McConigle DJ, O’Gorman RL, Puts NAJ, Vidyasagar R, Evans CJ.  
404 Current practice in the use of MEGA-PRESS spectroscopy for the detection of GABA.  
405 *Neuroimage* 2014; 86:43-52.
- 406 23. Gasparovic Ch, Chen H, Mullins PG. Errors in  $^1\text{H}$ -MRS estimates of brain  
407 concentrations caused by failing to take into account tissue-specific signal relaxation.  
408 *NMR Biomed* 2018; 31:e3914.
- 409 24. Quadrelli S, Mountford C, Ramadan S. Hitchhiker’s guide to voxel segmentation for  
410 partial volume correction of in vivo magnetic resonance spectroscopy. *Magn Reson*  
411 *Insights* 2016; 9:1-8.

- 412 25. Abbas Z, Gras V, Möllenhoff K, Oros-Peusquens AM, Shah NJ. Quantitative water  
413 content mapping at clinically relevant field strengths: A comparative study at 1.5 and  
414 3T. *Neuroimage* 2015; 106:404-413.
- 415 26. Sabati M and Maudsley AA. Fast and high-resolution quantitative mapping of tissue  
416 water content with full brain coverage for clinically-driven studies. *Magn Reson Imag*  
417 2013; 31:1752-1759.
- 418 27. Edden RAE, Intrapromkul J, Zhu H, Cheng Y, Barker PB. Measuring T2 in vivo with  
419 J-difference editing: application to GABA at 3 Tesla. *J Magn Reson Imag* 2012;  
420 35:229-234.
- 421 28. Puts NAJ, Barker PB, Edden RAE. Measuring the longitudinal relaxation time of  
422 GABA in vivo at 3 Tesla. *J Magn Reson Imag* 2013; 37:999-1003.
- 423 29. Lin C, Bernstein M, Huston J, Fain S. Measurements of T1 relaxation times at 3.0 T:  
424 Implication for MRA. In: *Proceedings of the 9th Annual Meeting of ISMRM; 2001;*  
425 *Glasgow, 2001:1391.*
- 426 30. Piechnik SK, Evans J, Bary LH, Wise RG, Jezzard P. Functional changes in CSF  
427 volume estimated using measurement of water T2 relaxation. *Mag Reson Med* 2009;  
428 61,579-586.
- 429 31. Stanisz GJ, Odrobina EE, Pun J, et al. T1, T2 relaxation and magnetization transfer in  
430 tissue at 3 T. *Magn Reson Med* 2005; 54:507-512.
- 431 32. Träber F, Block W, Lamerichs R, Gieseke J, Schild HH. 1H metabolite relaxation  
432 times at 3.0 Tesla: Measurements of T1 and T2 values in normal brain and  
433 determination of regional differences in transverse relaxation. *J Magn Reson Imag*  
434 2004; 19:537-545.

- 435 33. Ethofer T, Mader I, Seeger U, et al. Comparison of longitudinal metabolite relaxation  
436 times in different regions of the human brain at 1.5 and 3 Tesla. *Magn Reson Med*  
437 2003; 50:1296-1301.
- 438 34. Geramita N, van der Veen JW, Barnett AS, et al. Reproducibility of prefrontal  $\gamma$ -  
439 aminobutyric acid measurements with J-edited spectroscopy. *NMR Biomed* 2001;  
440 24:1098-1098.
- 441 35. Mikkelsen M, Rimbault DL, Barker PB, et al. Big GABA II: Water-referenced edited  
442 MR spectroscopy at 25 research sites. *Neuroimage* 2019; 191:537-548.
- 443 36. Choi C, Bhardwaj PP, Kalra S, et al. Measurement of GABA and contaminants in gray  
444 and white matter in human brain in vivo. *Magn Reson Med* 2007; 58:27-33.

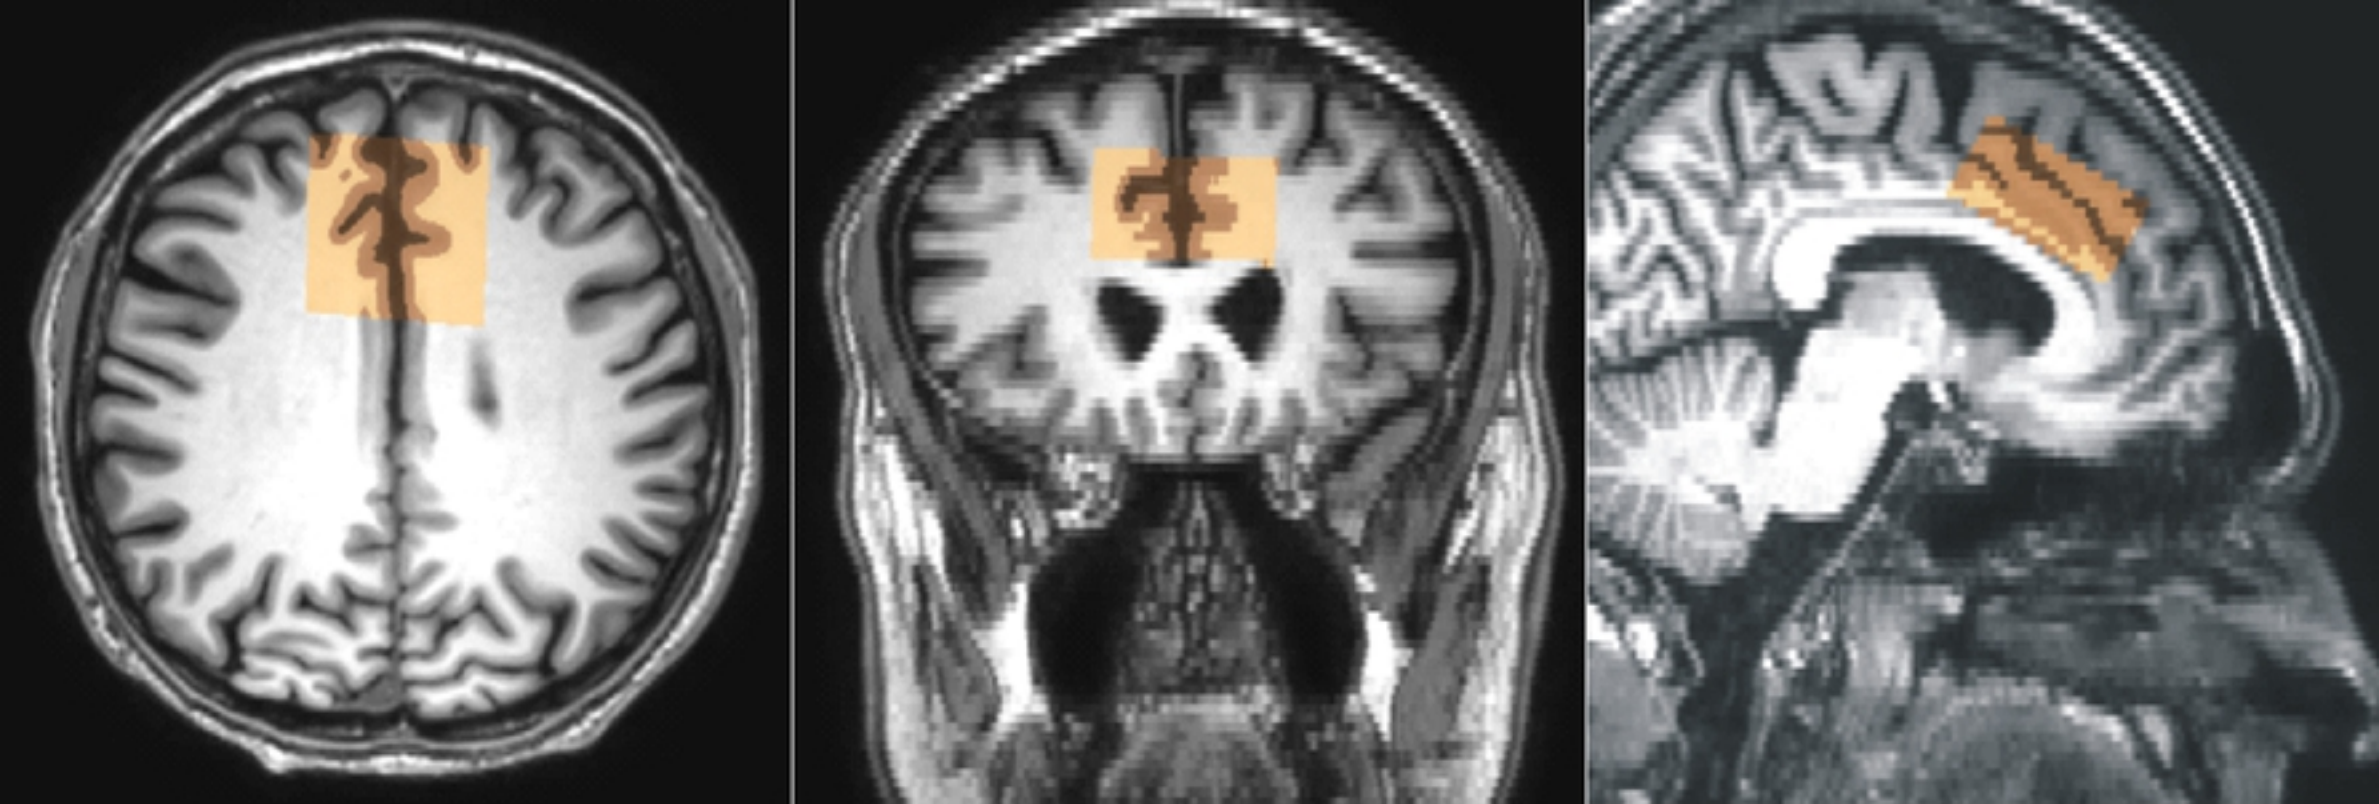

Figure 1

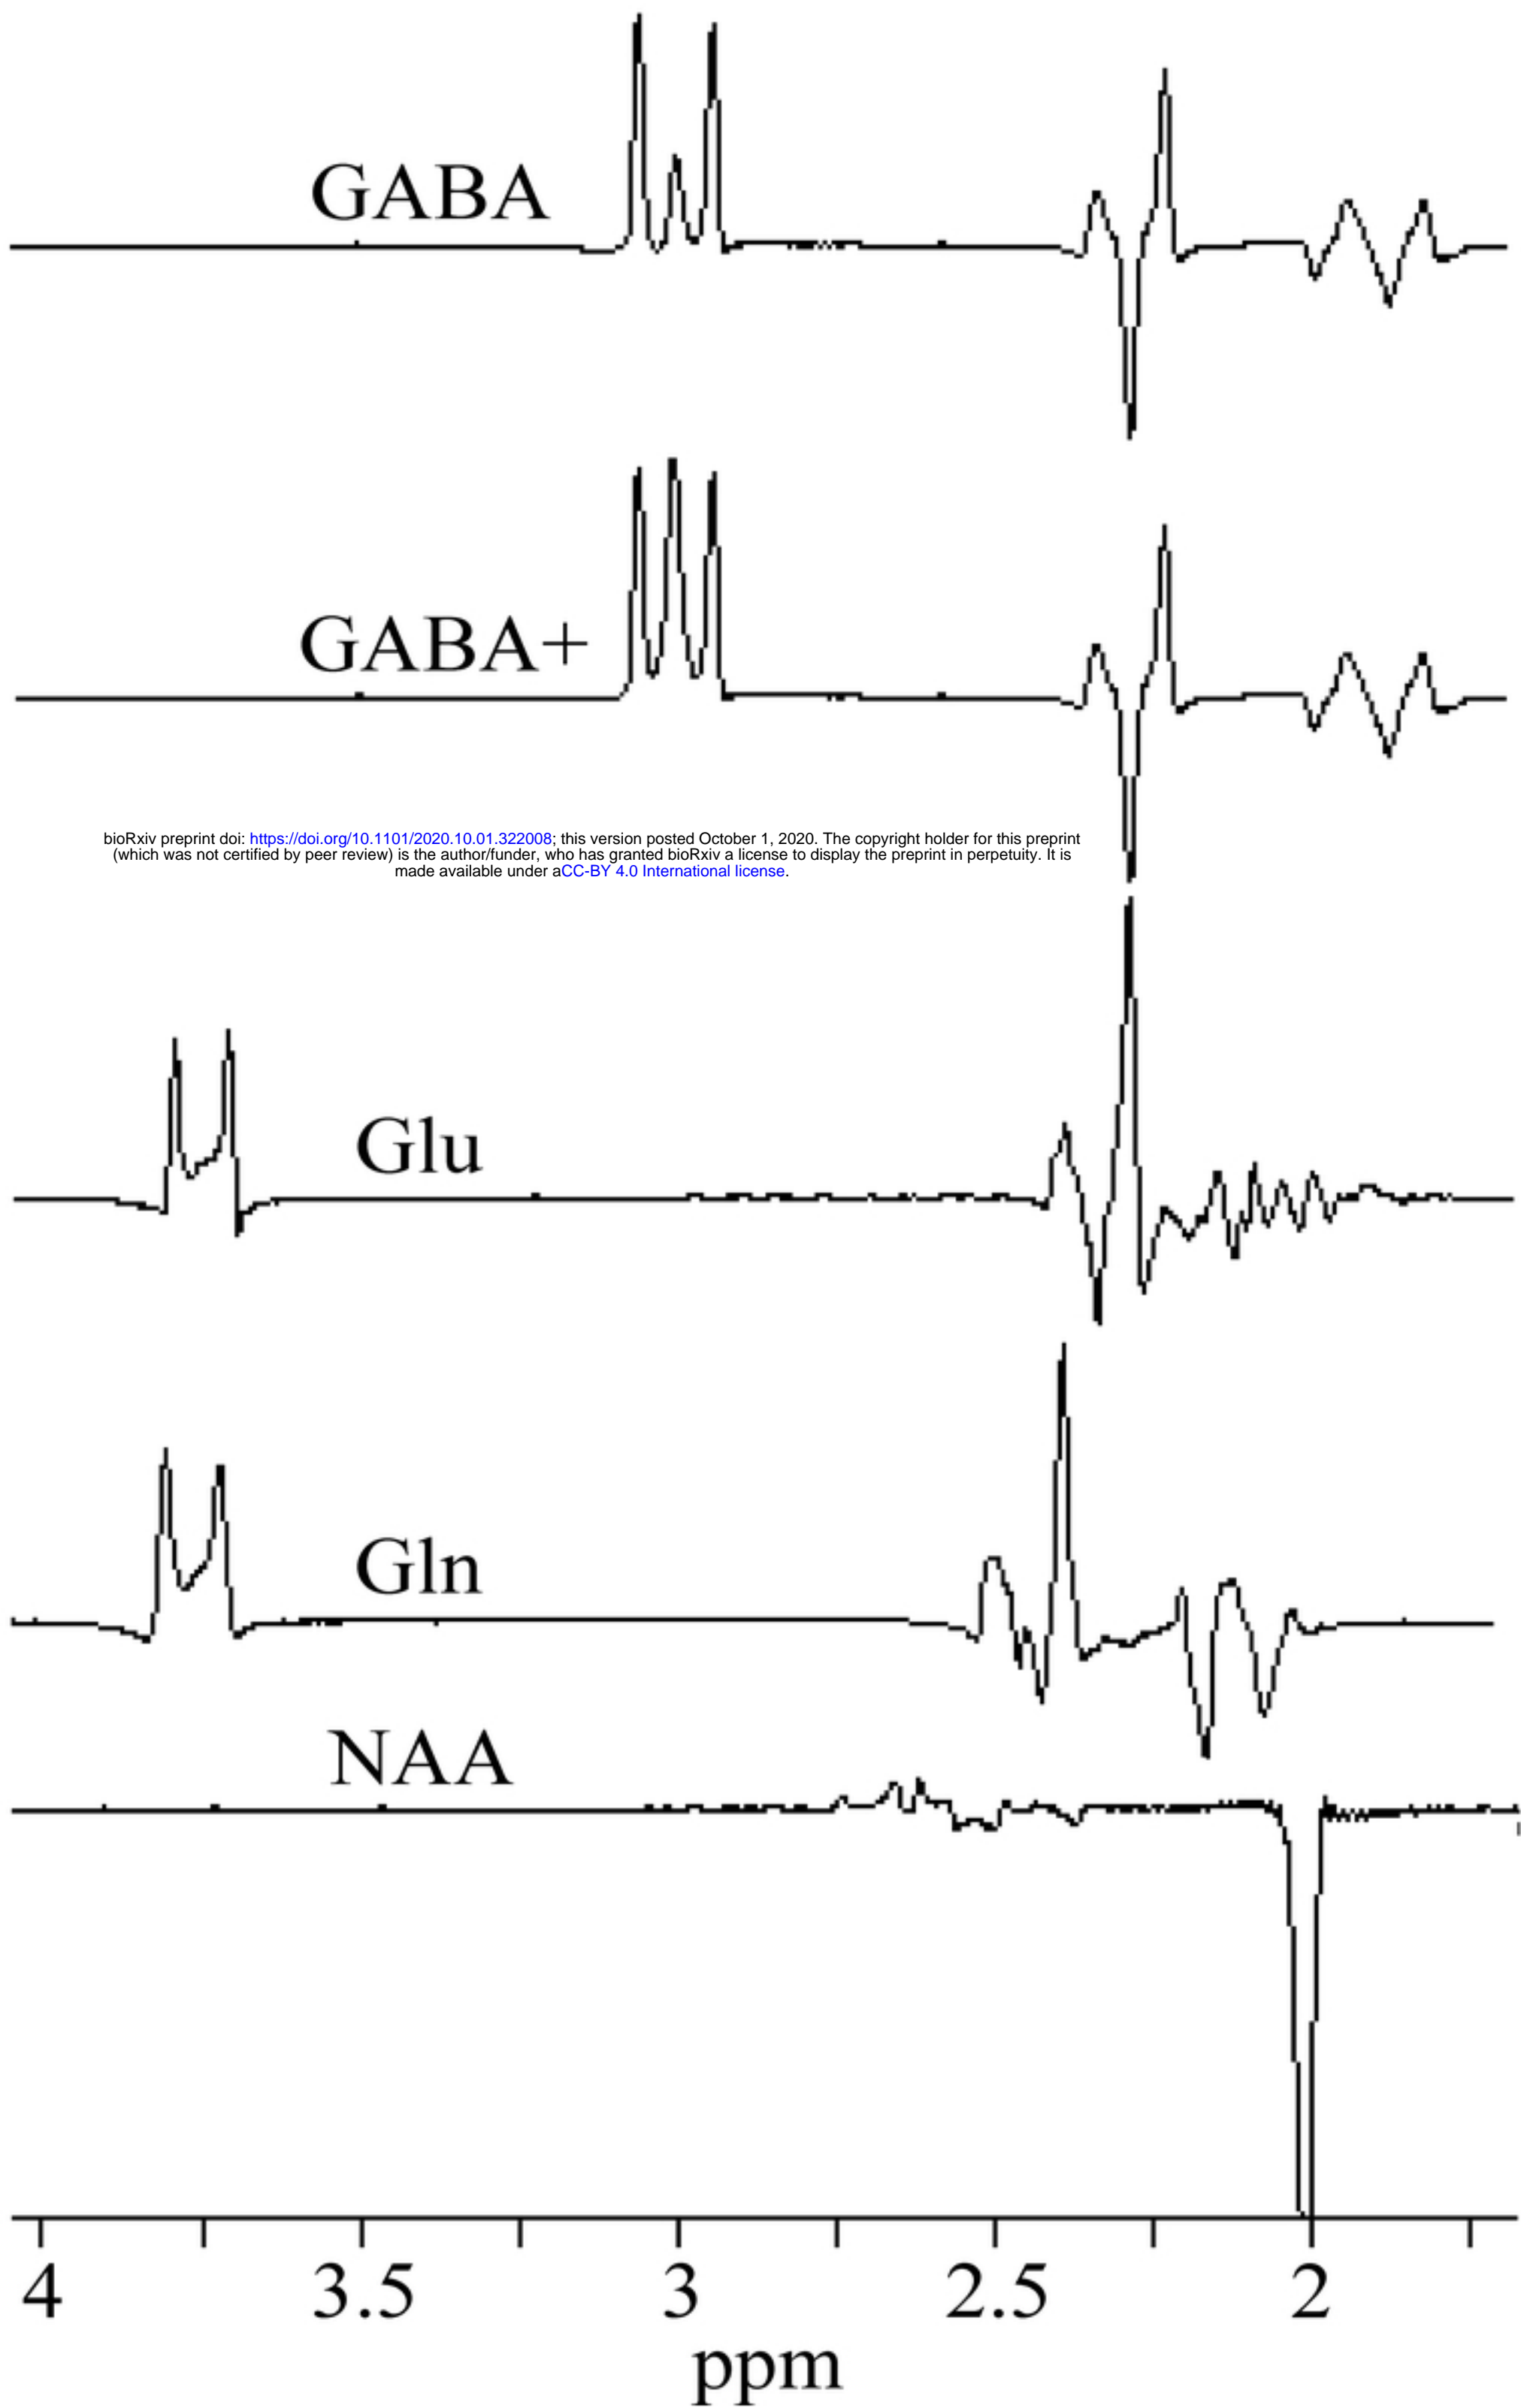

Figure 2

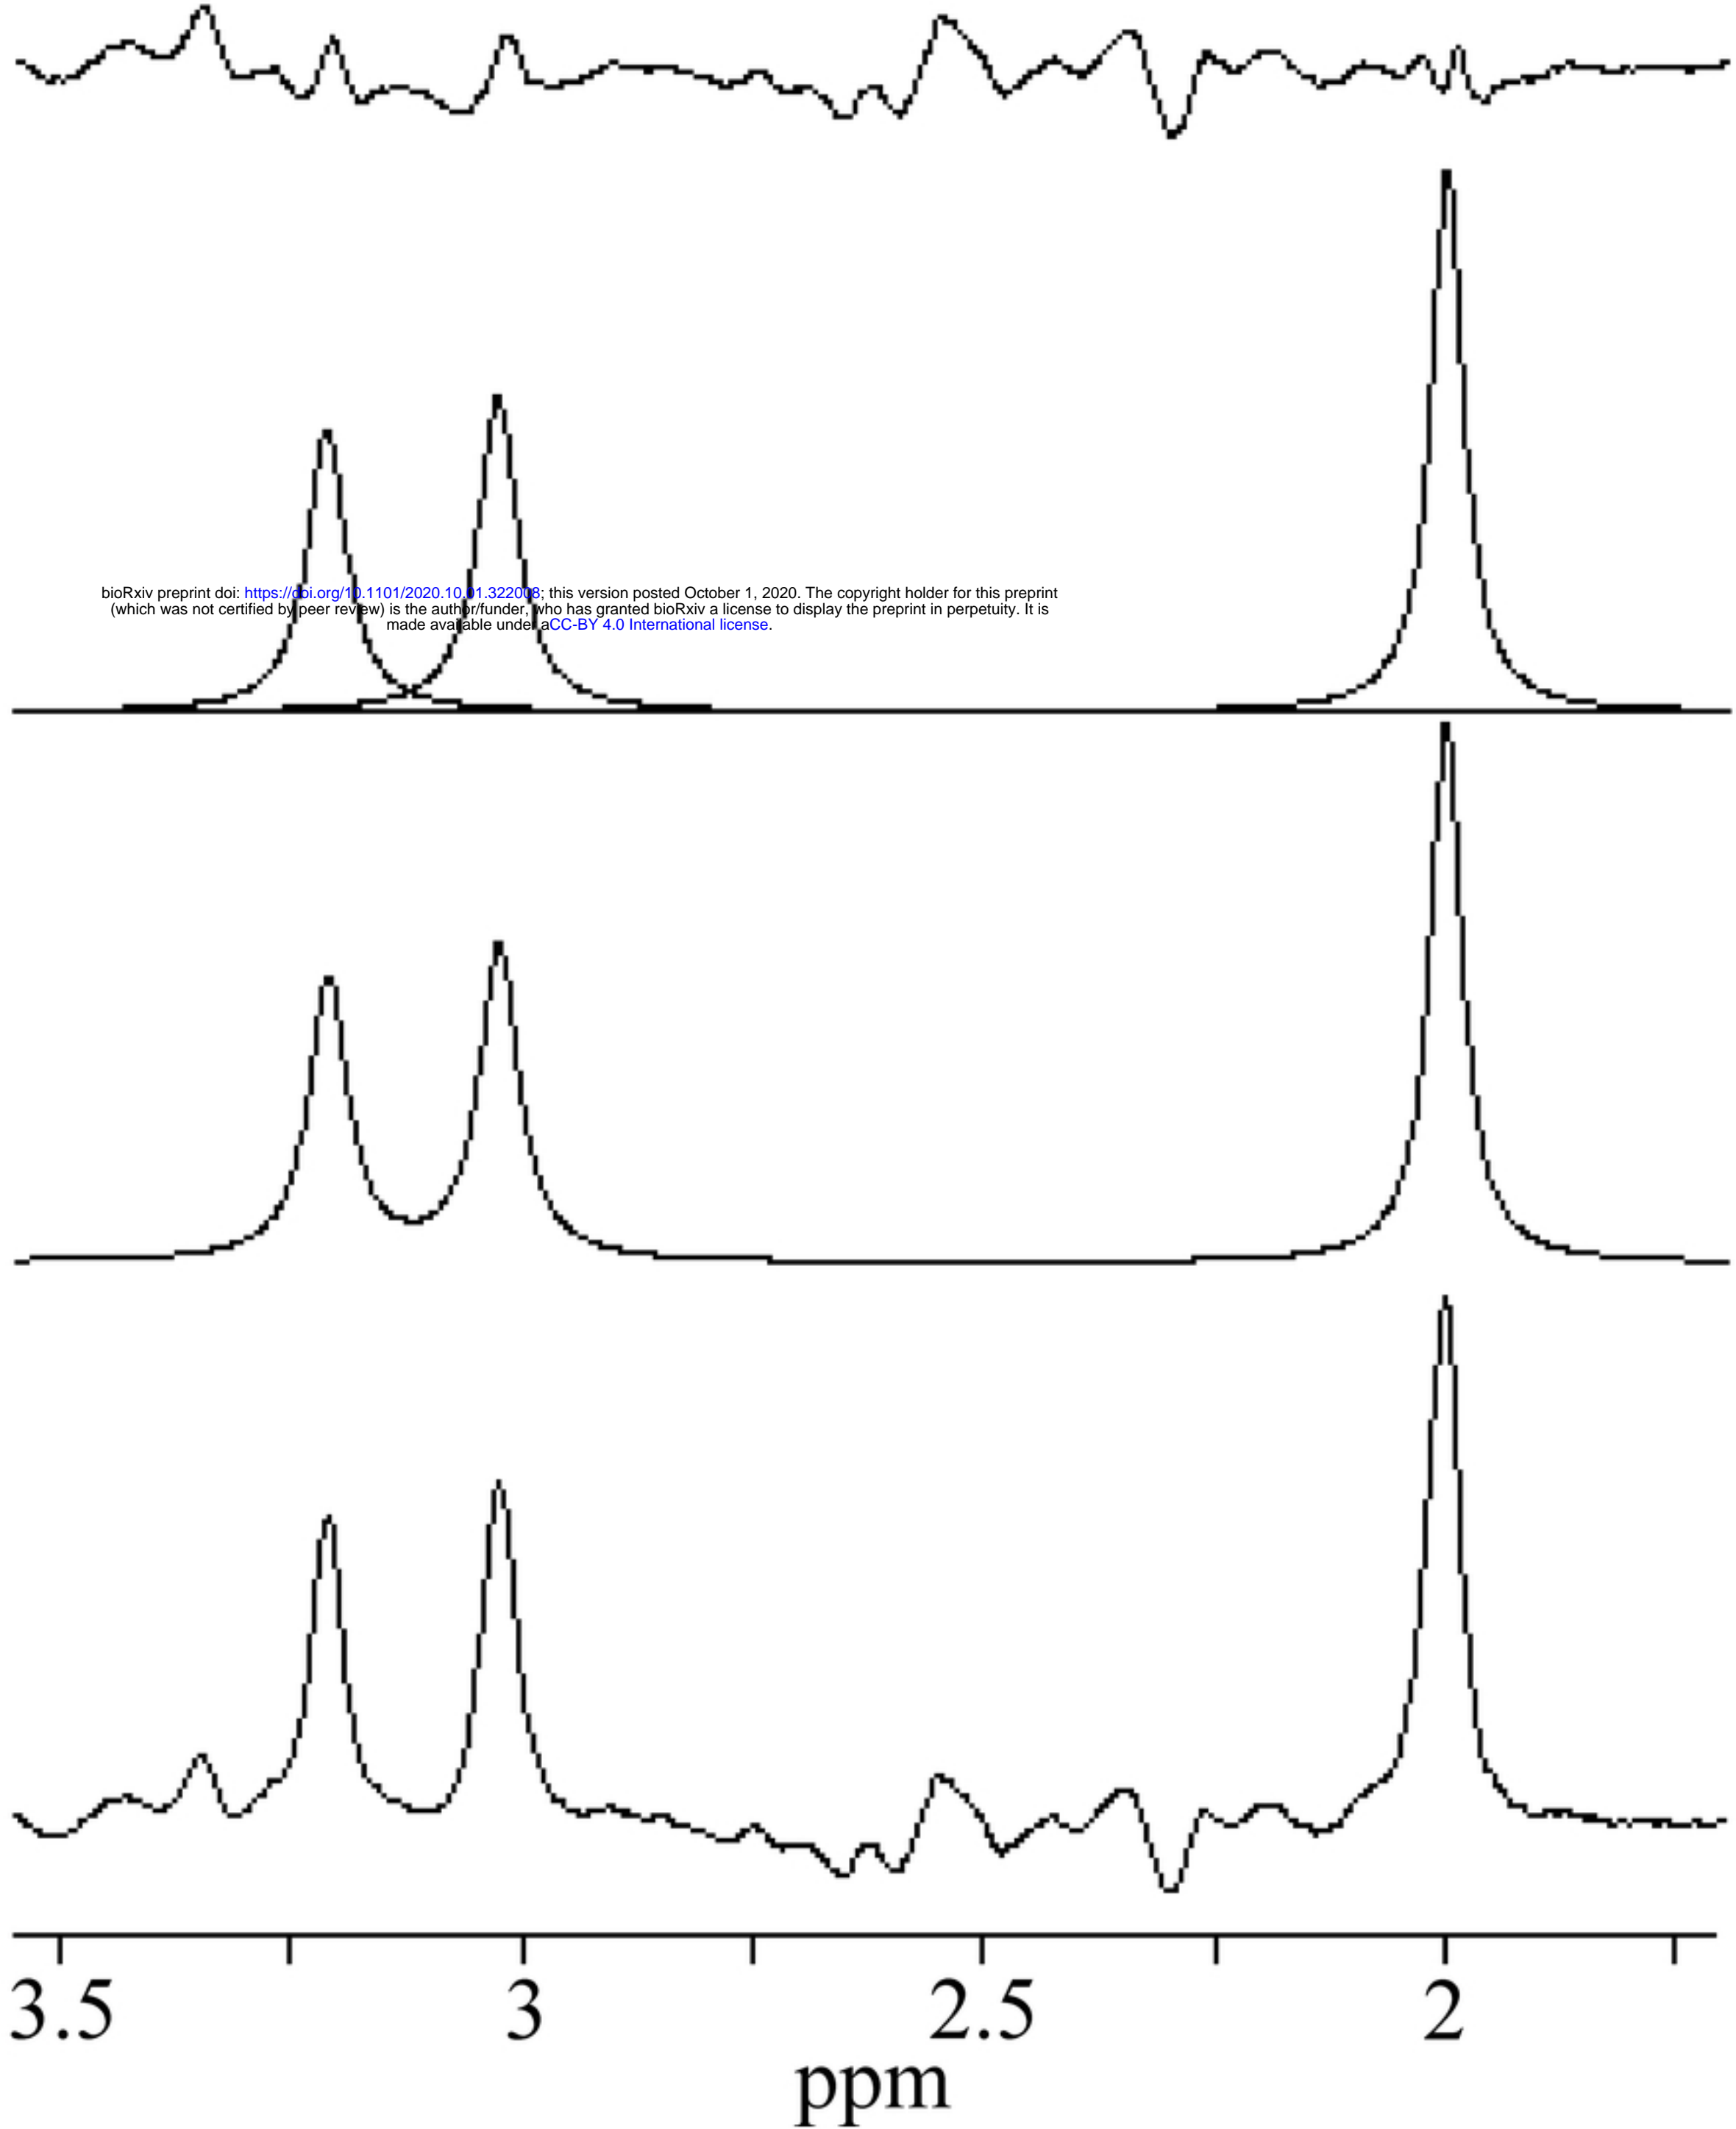

Figure 3

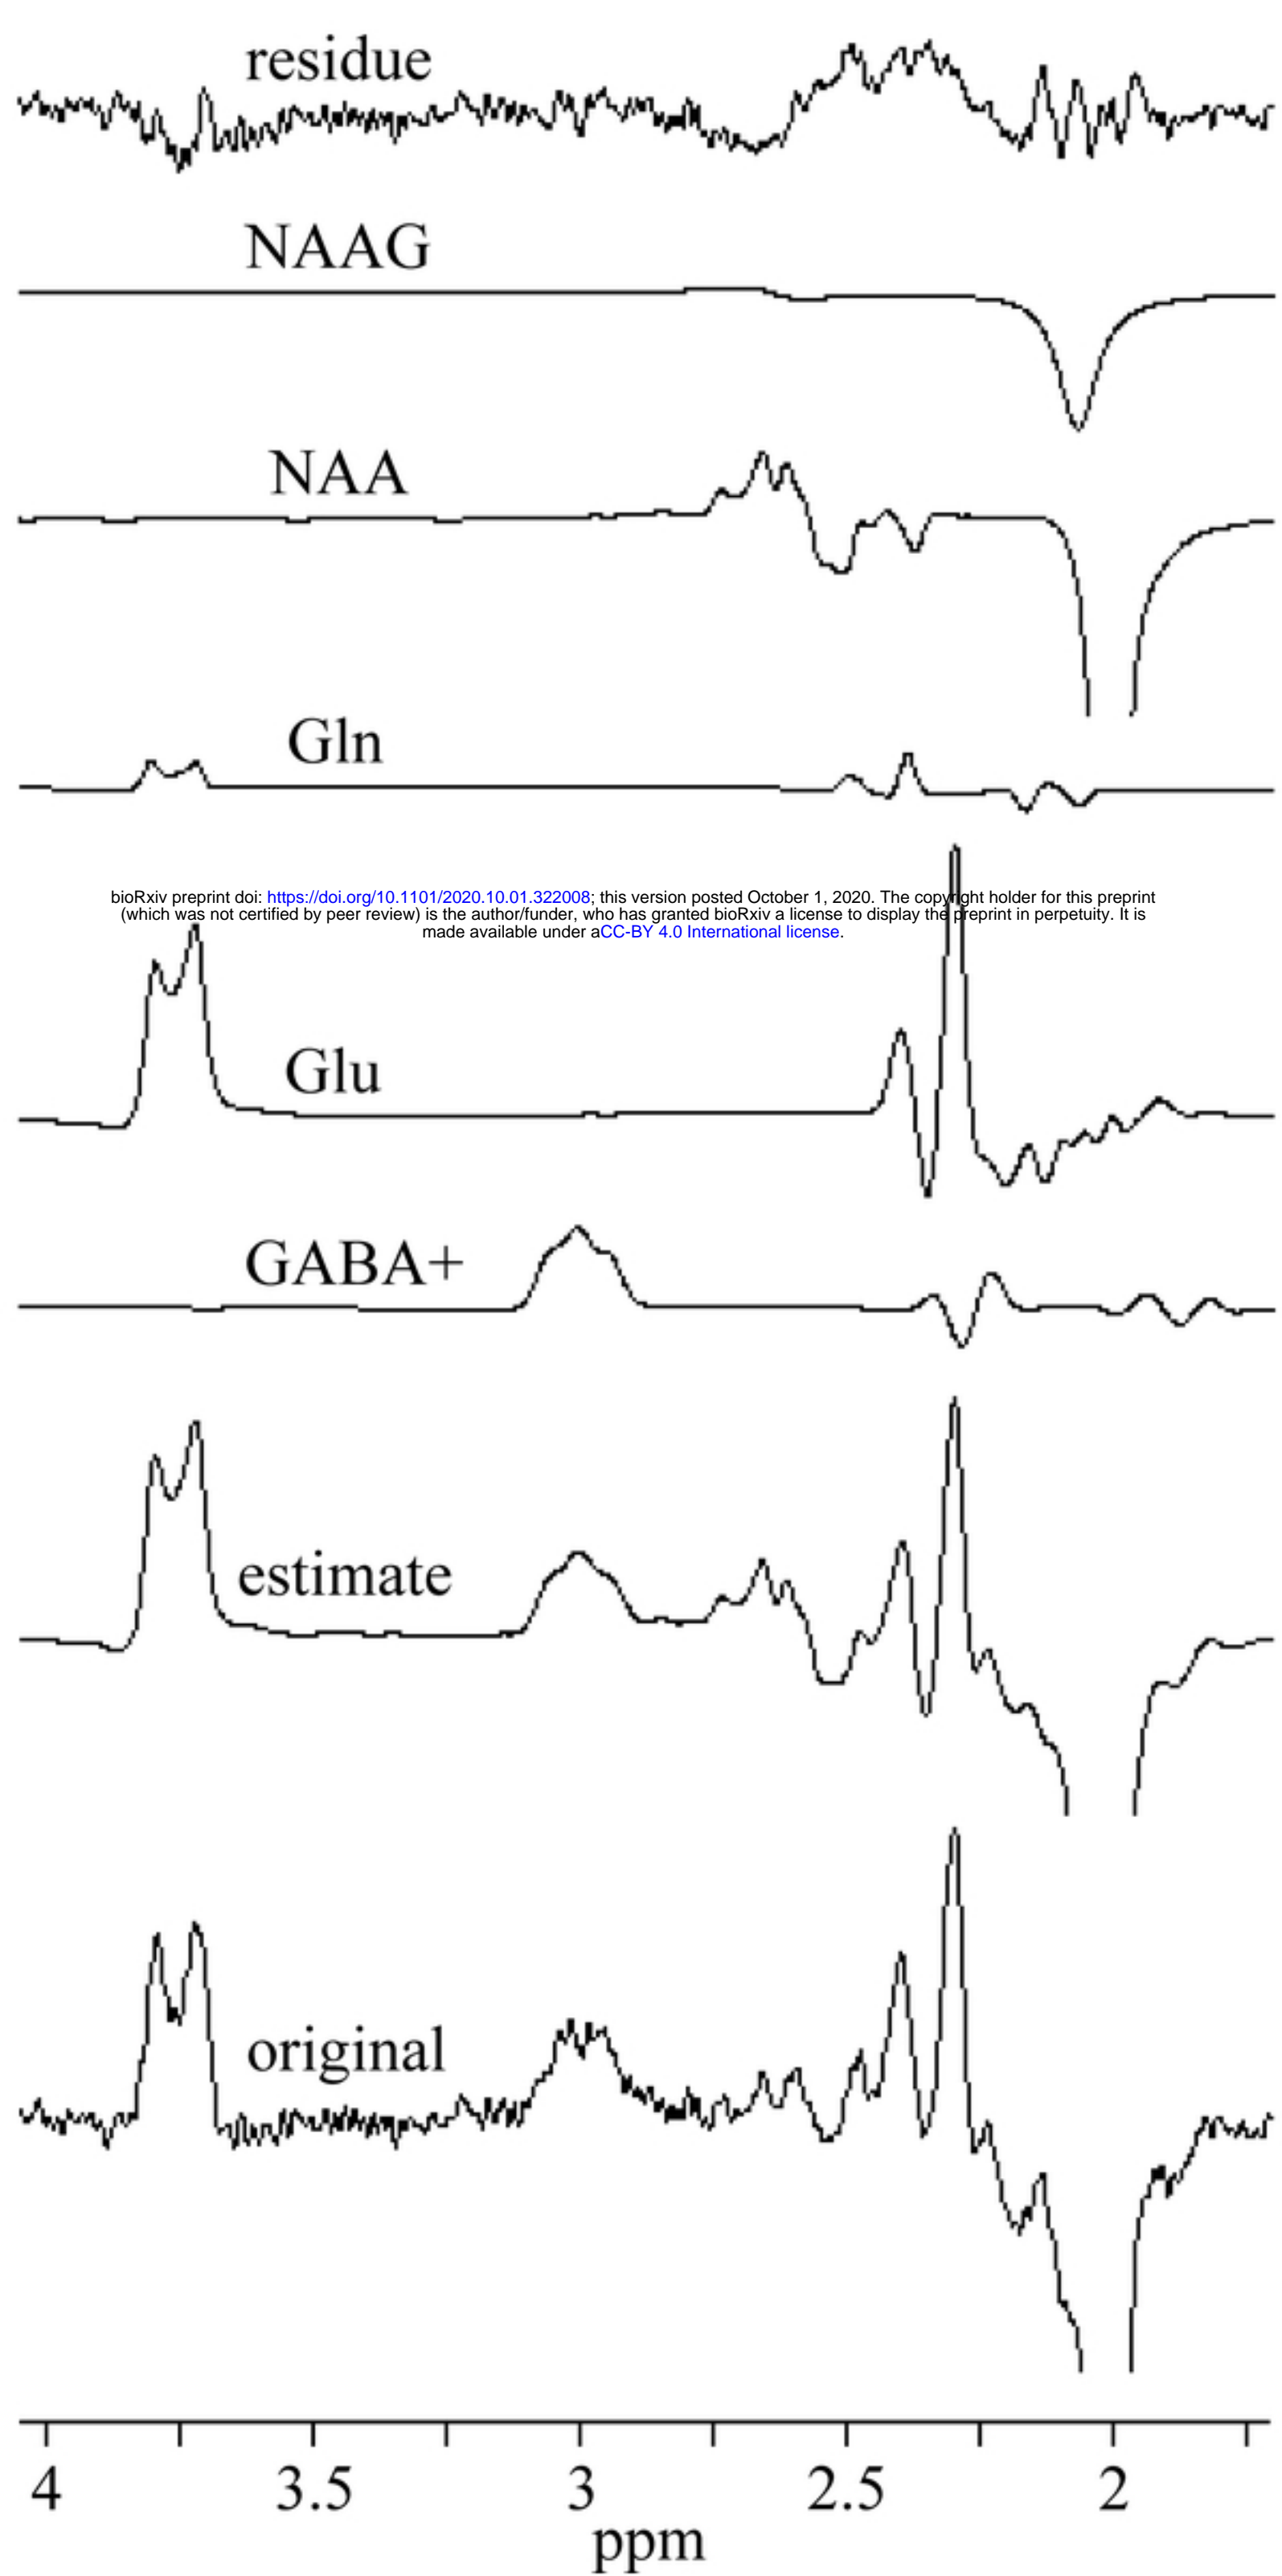

Figure 4

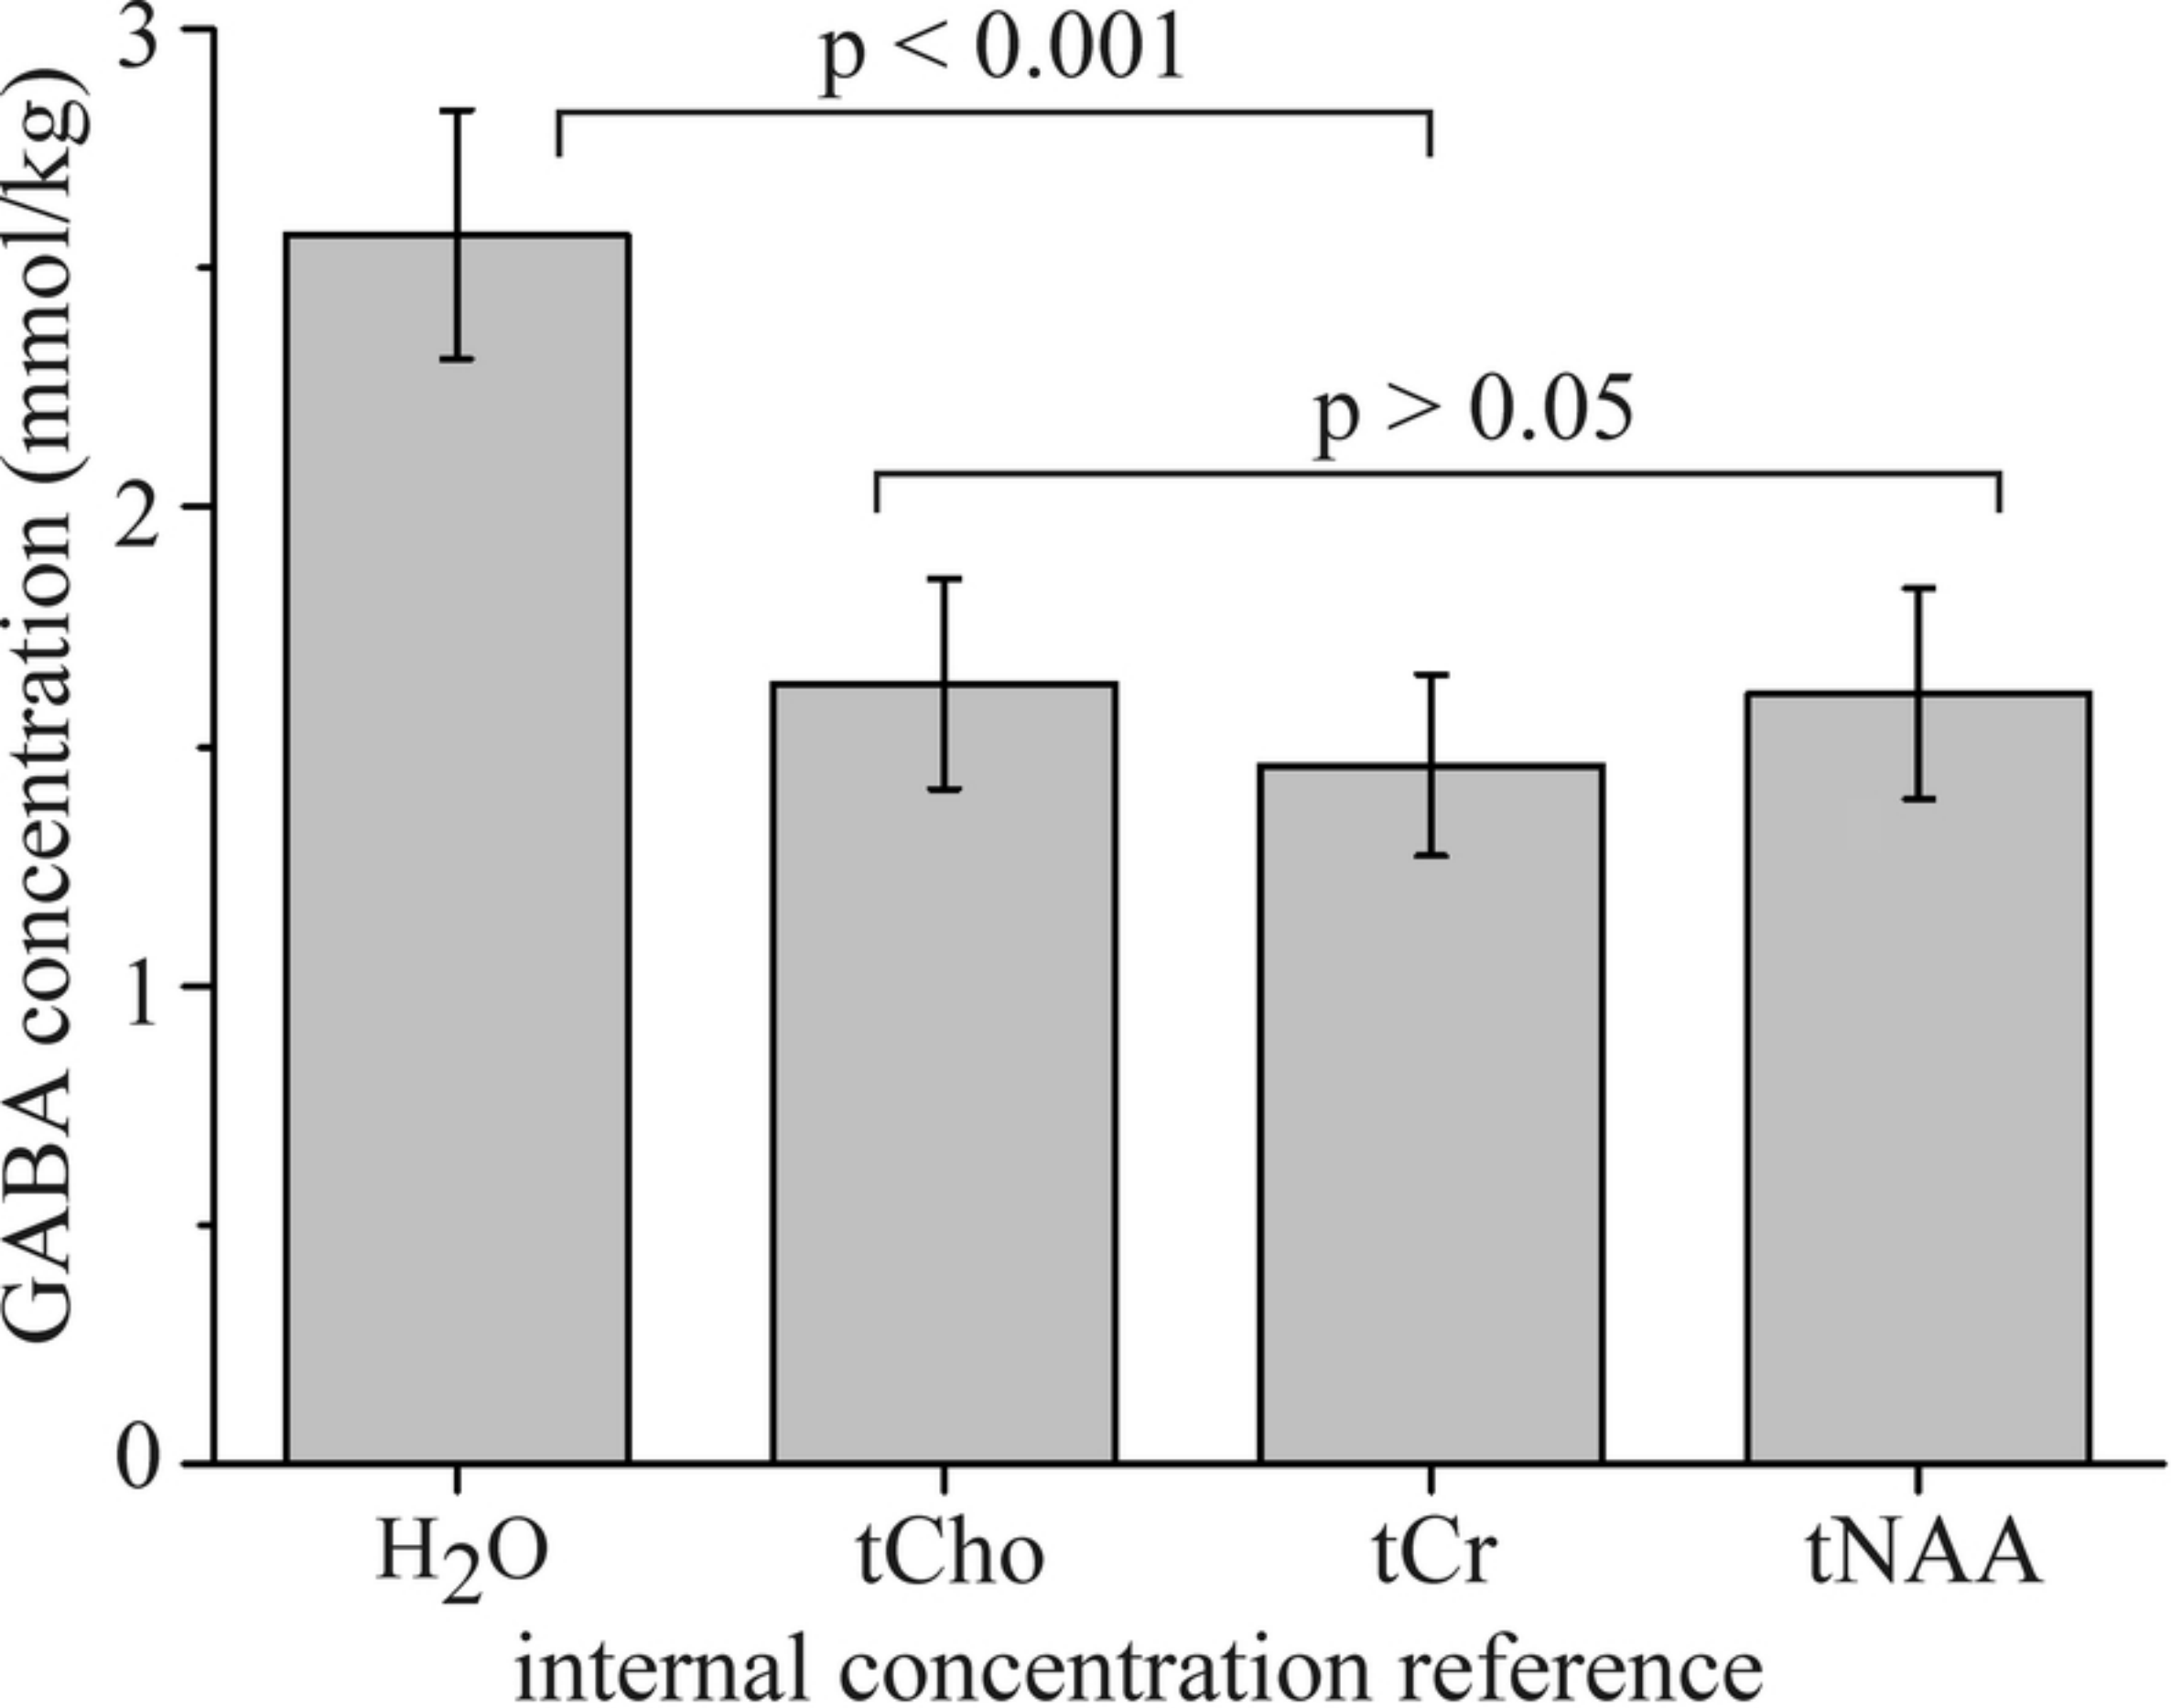

Figure 5
